# Supplementary material for: A molecular titration strategy: utilizing a built-in electric field to measure the lithium diffusion coefficient in LiFePO 4
Source: Royal Society of Chemistry journal article supplement (doi:10.1039/d5cp00481k), 2025-01-01
Supplement: d5cp00481k1.pdf [file d5cp00481k1.pdf]

# **A molecular titration strategy: utilizing built-in electric field to detect lithium diffusion coefficient in $\text{LiFePO}_4$**

Zexin Lin<sup>1</sup>, Zhihao Deng<sup>1</sup>, Xianrun Cao<sup>1</sup>, Lu Guo<sup>2</sup>, Feifei Zhang<sup>3</sup>, Sheng Liu<sup>1\*</sup>, Juezhi Yu<sup>1\*</sup>,  
Gangfeng Ouyang<sup>1</sup>

*<sup>1</sup>School of Chemical Engineering and Technology, Sun Yat-Sen University & Southern Marine Science and Engineering Guangdong Laboratory (Zhuhai), Zhuhai 519082, China*

*<sup>2</sup>School of Engineering, Yunnan University, Kunming 650091, China*

*<sup>3</sup>School of Materials Science and Engineering, Jilin University, Changchun 130015, China*

**Corresponding Author\***

Email: [yujzh8@mail.sysu.edu.cn](mailto:yujzh8@mail.sysu.edu.cn)

## **Experimental section**

### **Materials**

Potassium ferricyanide ( $\text{K}_3[\text{Fe}(\text{CN})_6]$ ) (SPAIN, 98%), Potassium ferrocyanide ( $\text{K}_4[\text{Fe}(\text{CN})_6]$ ) (Shanghai Yuanye Biotechnology, 99.5%),  $\text{LiFePO}_4$  (Shanghai Dibai Biotechnology, 98%)

### **Preparation of titration solutions**

Potassium ferricyanide ( $\text{K}_3[\text{Fe}(\text{CN})_6]$ ) is chosen in this study because it is a reversible, robustness and environmental friendly redox couple, which may ensure reproducibility of the test process. Specifically, 3.2924 g  $\text{K}_3[\text{Fe}(\text{CN})_6]$  was added to 100 mL deionized water to prepare 100 mL, 0.1 M  $\text{K}_3[\text{Fe}(\text{CN})_6]$  solution, 4.2239 g  $\text{K}_4[\text{Fe}(\text{CN})_6]$  also was added to 100 mL deionized water to prepare 100 mL, 0.1 M  $\text{K}_4[\text{Fe}(\text{CN})_6]$  solution. Subsequently, 1 mmol (0.157757 g)  $\text{LiFePO}_4$  was added into 25 mL  $\text{K}_4[\text{Fe}(\text{CN})_6]$  solution in a three electrode cell to establish an equilibrium state. To collect a series of potential change data, it is necessary to divide the titration process into multiple times. In other words, 0.1 M  $\text{K}_3[\text{Fe}(\text{CN})_6]$  solution was added into  $\text{LiFePO}_4$  &  $\text{K}_4[\text{Fe}(\text{CN})_6]$  solution stepwise with volume of 0.5 mL for each titration. The added total amount of 0.1 M  $\text{K}_3[\text{Fe}(\text{CN})_6]$  solution at the end of the titration is 20 mL, corresponding 2.0 mmol.

### **X-ray diffraction (XRD) measurement**

All the X-ray patterns were collected by D8 ADVANCE X-ray powder diffraction system with  $\text{Cu}$  ( $\lambda=0.154$  nm)  $\text{Co}$  ( $\lambda=0.179$  nm) beam under the accelerating voltage of 40 kV.

### **Scanning electron microscopy (SEM)**

Morphology of  $\text{LiFePO}_4$  was characterized with SEM (SU8010) at an accelerating voltage of

3 kV.

### **Brunauer Emmett Teller (BET) Test**

The specific surface area ( $S$ ) is measured with  $N_2$  adsorption-desorption isotherms by BET method at 77K.

### **Construction of MTT system**

MTT system mainly consists of working electrode, counter electrode and reference electrode. Here, we select Titanium plate as working and counter electrode for its excellent corrosion resistance and outstanding electrochemical performance, the reference electrode is Ag/AgCl. Moreover, the MTT system is put on a magnetic stirrer and a stir bar is put into MTT system to reduce concentration polarization and increase the reaction rate. The whole MTT system is displayed in Figure S8.

### **Open circuit potential monitoring**

As we described in the main text, the decreasing value of the open circuit potential (OCP) is correlated with the amount of extracted  $Li^+$  through Nernst equation, and the decreasing rate of the OCP is depend on the diffusion rate of  $Li^+$  in the  $LiFePO_4$  solid. If we can establish the formulation between decreasing rate of OCP and diffusion rate of  $Li^+$  in  $LiFePO_4$  solid, the diffusion coefficient of  $Li^+$  in  $LiFePO_4$  solid can be calculated out through this formulation. Therefore, the OCP decreasing trend need to be monitored. A Corrtest electrochemical workstation (CS310X-4) was used to monitor the decreasing rate of OCP.

### **Finite difference method (FDM) to calculation**

The finite difference method (FDM) is a numerical method for solving differential equations

by approximating the derivatives using finite difference approximations. It involves replacing the derivatives in the differential equation with algebraic expressions that approximate the rate of change of the function at discrete points in the domain. This method converts the differential equation into a system of algebraic equations, which can then be solved to obtain an approximate solution to the original differential equation. Therefore, FDM method is used

to calculate the numerical value of  $\frac{dE}{d\sqrt{t}}$ . The software is MATLAB package.

## Supporting figures

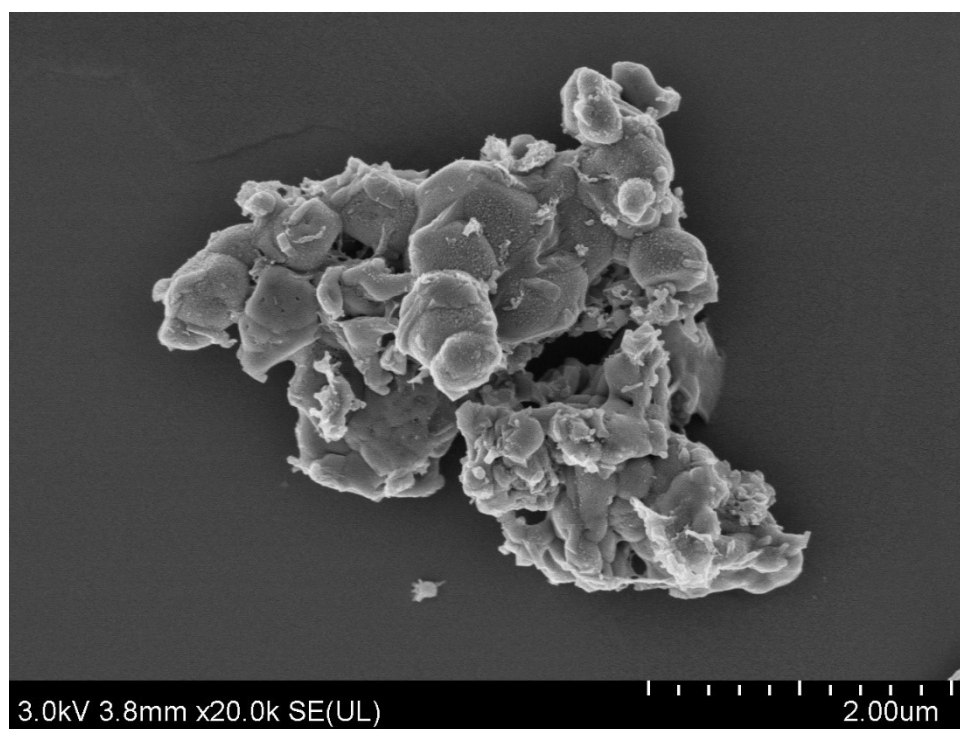

**Figure S1.** Scanning electronic microscopy (SEM) of LiFePO<sub>4</sub> material

## BET Report

| BET surface area      | Correlation coefficient | Molecular –sectional area |
|-----------------------|-------------------------|---------------------------|
| 12.7543m <sup>2</sup> | 0.9999938               | 0.1620nm <sup>2</sup>     |

**Figure S2.** The BET test results of LiFePO<sub>4</sub> material

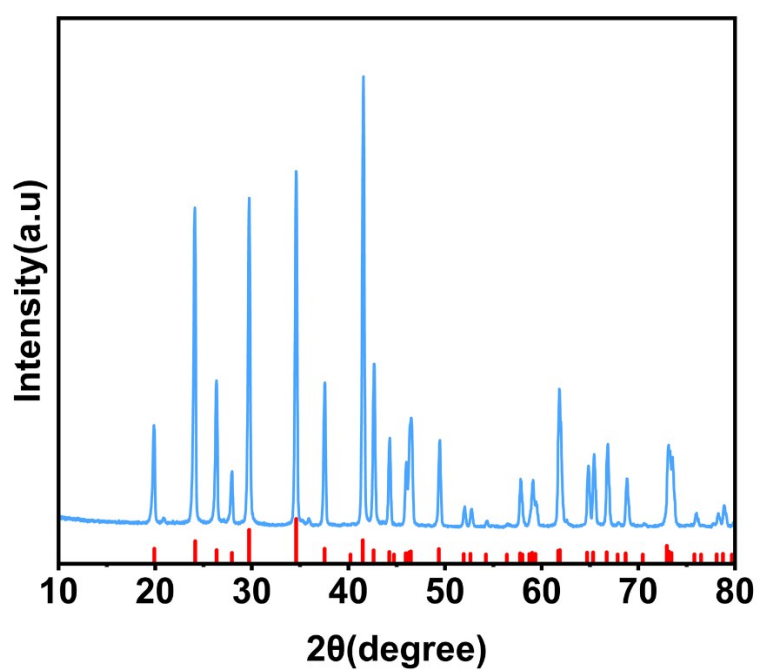

**Figure S3.** X-ray diffraction patterns of LiFePO<sub>4</sub> powder

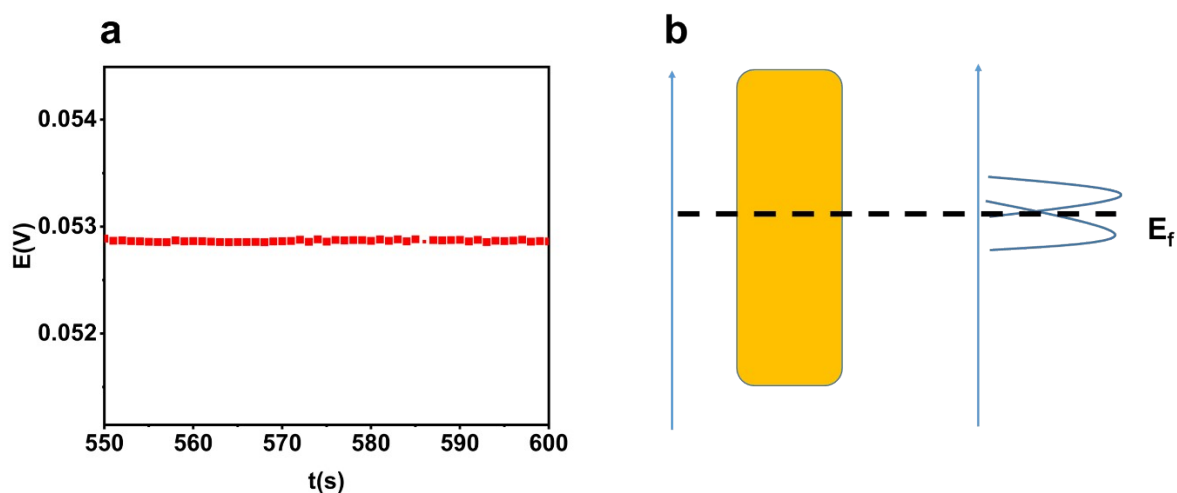

**Figure S4.** The system potential after adding  $\text{LiFePO}_4$  into  $\text{K}_4\text{Fe}[(\text{CN})_6]$  solution. (a) The open circuit potential (OCP). (b) The schematic of Fermi level energy after reaching to equilibrium state.

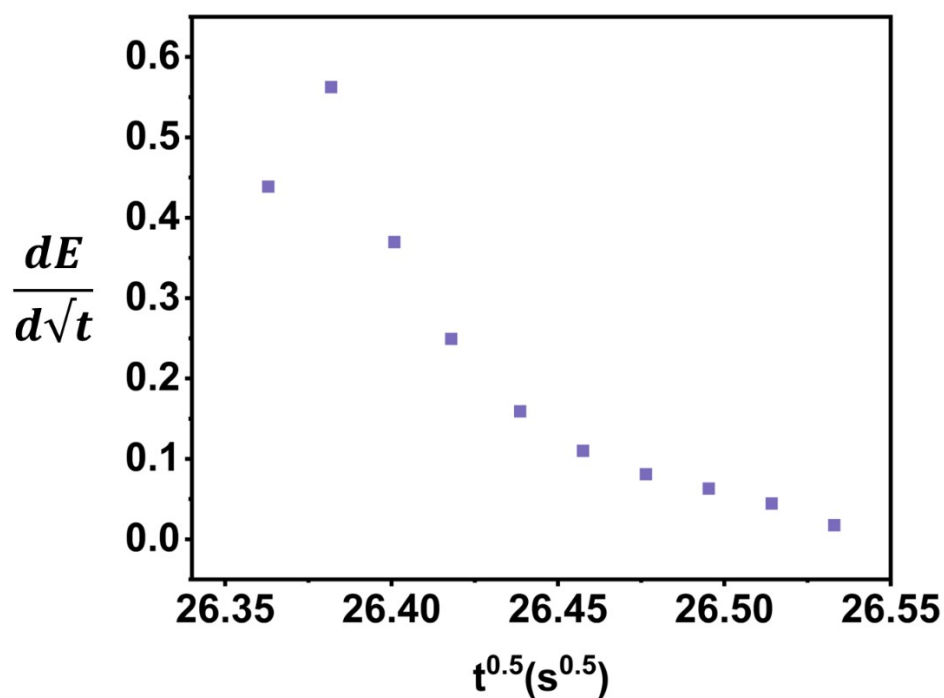

**Figure S5.** The value of  $\frac{dE}{d\sqrt{t}}$  at different  $t^{0.5}$ , the figure indicates that  $\frac{dE}{d\sqrt{t}}$  is a variable

depended on  $\sqrt{t}$ .

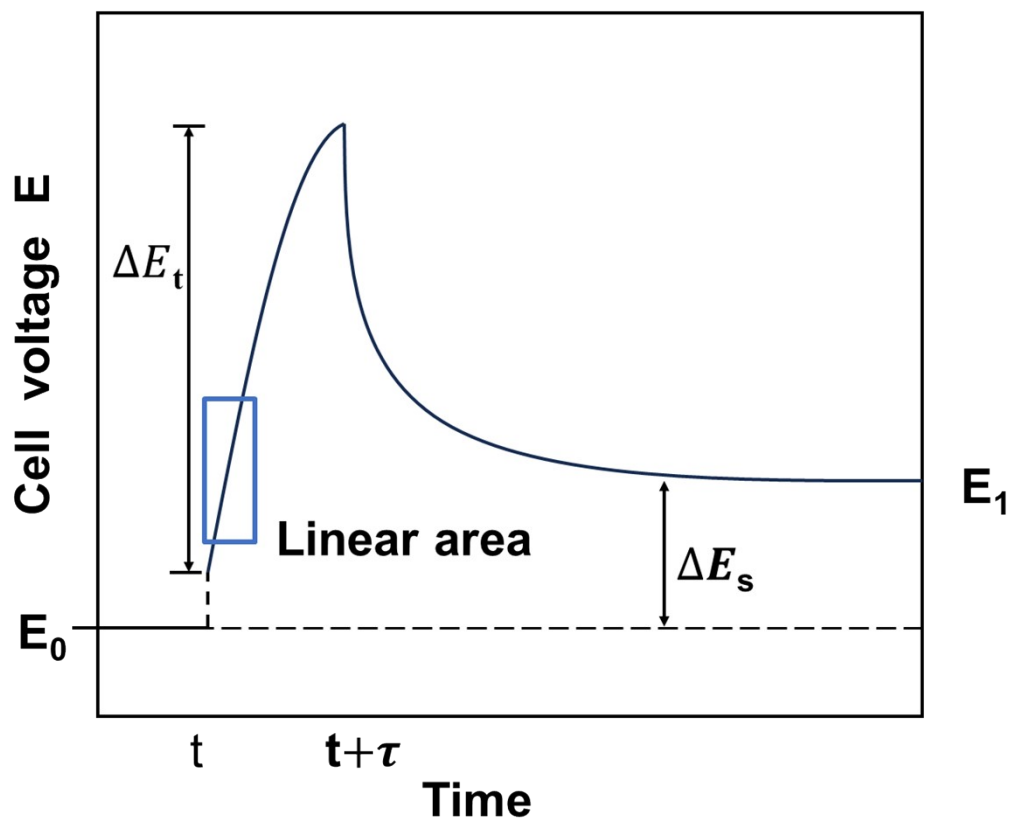

**Figure S6.** The  $\frac{dE}{d\sqrt{t}}$  obtained from the linear area in GITT. In the linear area, the  $\frac{dE}{d\sqrt{t}}$  value can be obtained from the most fitted data.



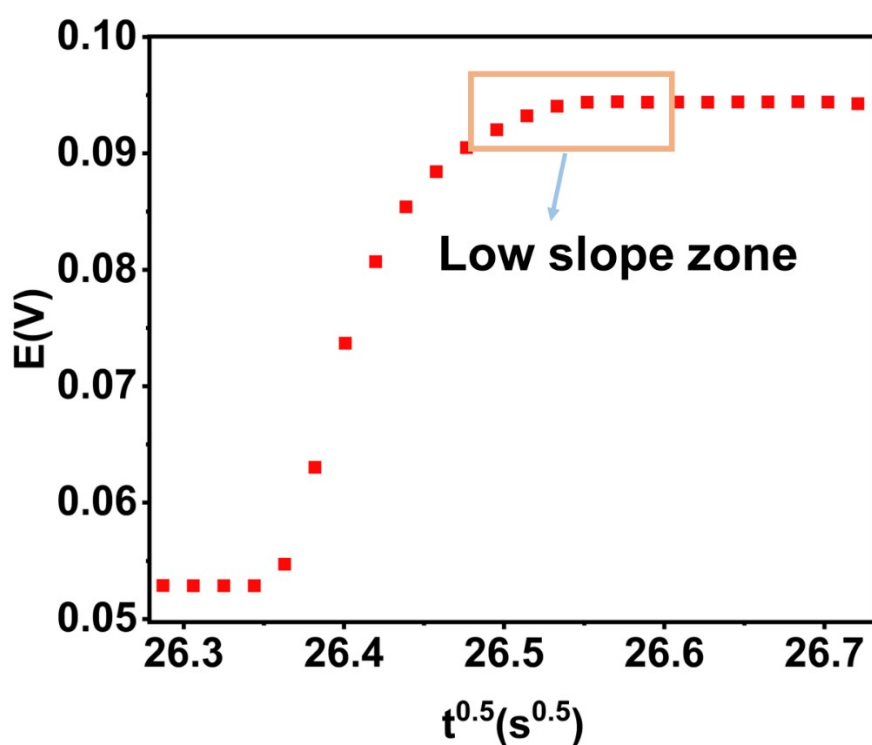

**Figure S7.** The select of low slope zone in  $E$  vs.  $\sqrt{t}$  curve, from the framed area, the value of  $\frac{dE}{d\sqrt{t}}$  can be determined by FDE method.

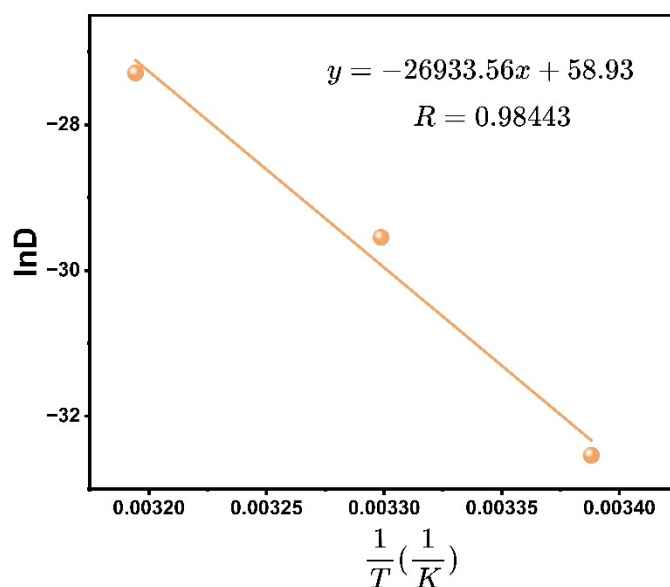

**Figure S8:** The fitted curve manufactured from x equals 0.2. In figure S8, the activation

energy can be calculated from the equation of fitted curve equation and  $E_a=223.92\text{KJ/mol}$
